# Supplementary material
Source: PubMed Central journal article supplement (PMC3698879)
Supplement: NIHMS481839-supplement-01.pdf [file NIHMS481839-supplement-01.pdf]

### Supplemental Figure 1

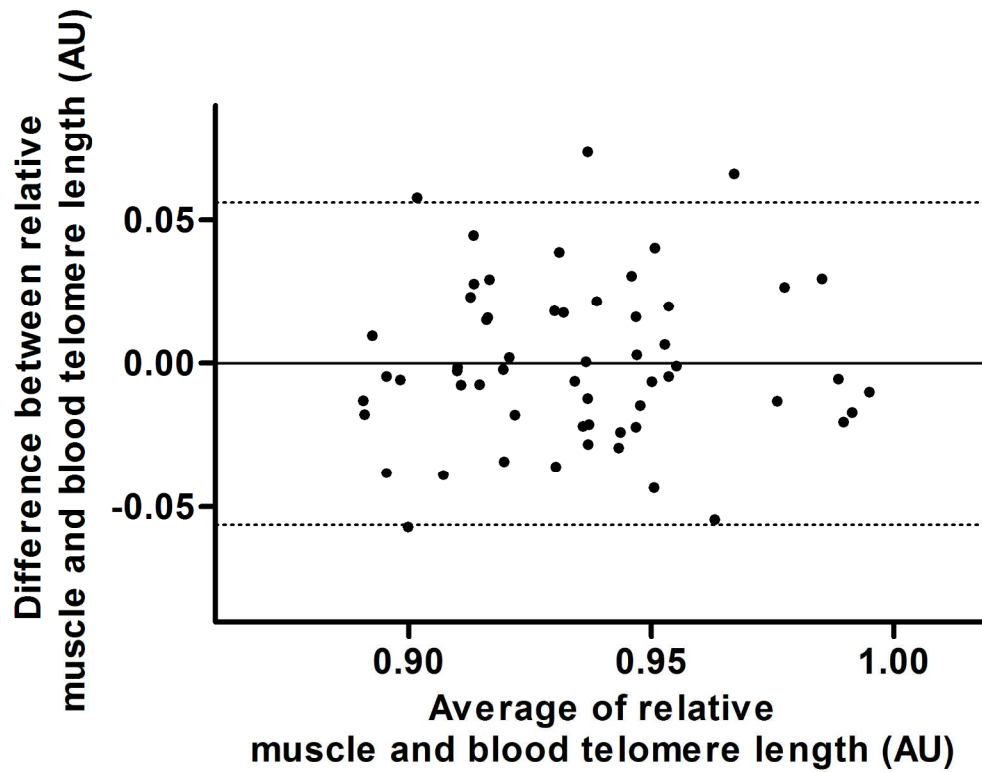

**Supplemental Figure 1** Bland-Altman plot comparing muscle and blood telomere length in the MEI and Botnia-PPP studies (n = 58). The middle horizontal line represents the mean calculated difference between **muscle and blood telomere length** and the upper and lower horizontal dashed lines represent 2 SD above and below the mean (limits of agreement).

**Supplementary Table 1** Characteristics of participants from Malmö Exercise Intervention (MEI) and Botnia-PPP study

|                                          | MEI (n=27)     | Botnia-PPP Study (n=31) |
|------------------------------------------|----------------|-------------------------|
| Age (years)                              | 38.3 (4.2)     | 50.8 (11.3)*            |
| Gender % (male/female)                   | 100 / 0 (27/0) | 48/52 (15/16)*          |
| BMI (kg/m <sup>2</sup> )                 | 28.3 (4.2)     | 28.3 (4.8)              |
| Fasting glucose (mmol/l)                 | 4.23 (0.49)    | 5.33 (0.45)*            |
| 2-h glucose (mmol/l)                     | 5.85 (1.32)    | 5.17 (1.47)             |
| Fasting insulin (mU/l)                   | 6.25 (6.62)    | 5.83 (4.02)             |
| Relative Leucocyte telomere Length ( AU) | 0.96 (0.02)    | 0.92 (0.02)*            |
| Relative Muscle Telomere Length (AU)     | 0.95 (0.03)    | 0.92 (0.03)*            |

Abbreviations: BMI, body mass index;

Unless otherwise specified, data are prevalence (number) for categorical variables and mean (SD) for continuous variables, apart from the non-normally distributed variables (fasting), where median (interquartile range) is presented. Interquartile range calculated as Q3-Q1. Frequency of participants between MEI and Botnia-PPP studies was assessed by the chi-squared test. Associations for continuous variables including age, BMI, fasting glucose, 2-hr glucose, fasting insulin, relative **leucocyte telomere length** and relative **muscle telomere length** were assessed by the student's t-test, apart from non-normally distributed variables (fasting insulin), where the Kruskal -Wallis test was used. \*  $P < 0.01$
